# Supplementary material for: Polydopamine Nanoparticles Attenuate Retina Ganglion Cell Degeneration and Restore Visual Function After Optic Nerve Injury
Source: Research Square preprint supplement (doi:10.21203/rs.3.rs-940186/v1), 2021-10-01
Supplement: Supplementary file 1 [file 4912fc7d789168a0c913ba3a.docx]

**Supporting Information**

**Polydopamine nanoparticles** **attenuate retina ganglion cell degeneration and restore visual function in optic nerve injury**

Xiaotong Lou1, Yuanyuan Hu1, Jia Liu2*, Yin Zhao1*

1 Department of Ophthalmology, Tongji Hospital, Tongji Medical College, Huazhong University of Science and Technology, Wuhan 430030, China.

2 Research Center for Tissue Engineering and Regenerative Medicine, Union Hospital, Tongji Medical College, Huazhong University of Science and Technology, Wuhan, 430022, China.

* Correspondence should be addressed to: Jia Liu (Email: jialiu1207@hust.edu.cn);

Yin Zhao (Email: zhaoyin85@hust.edu.cn)


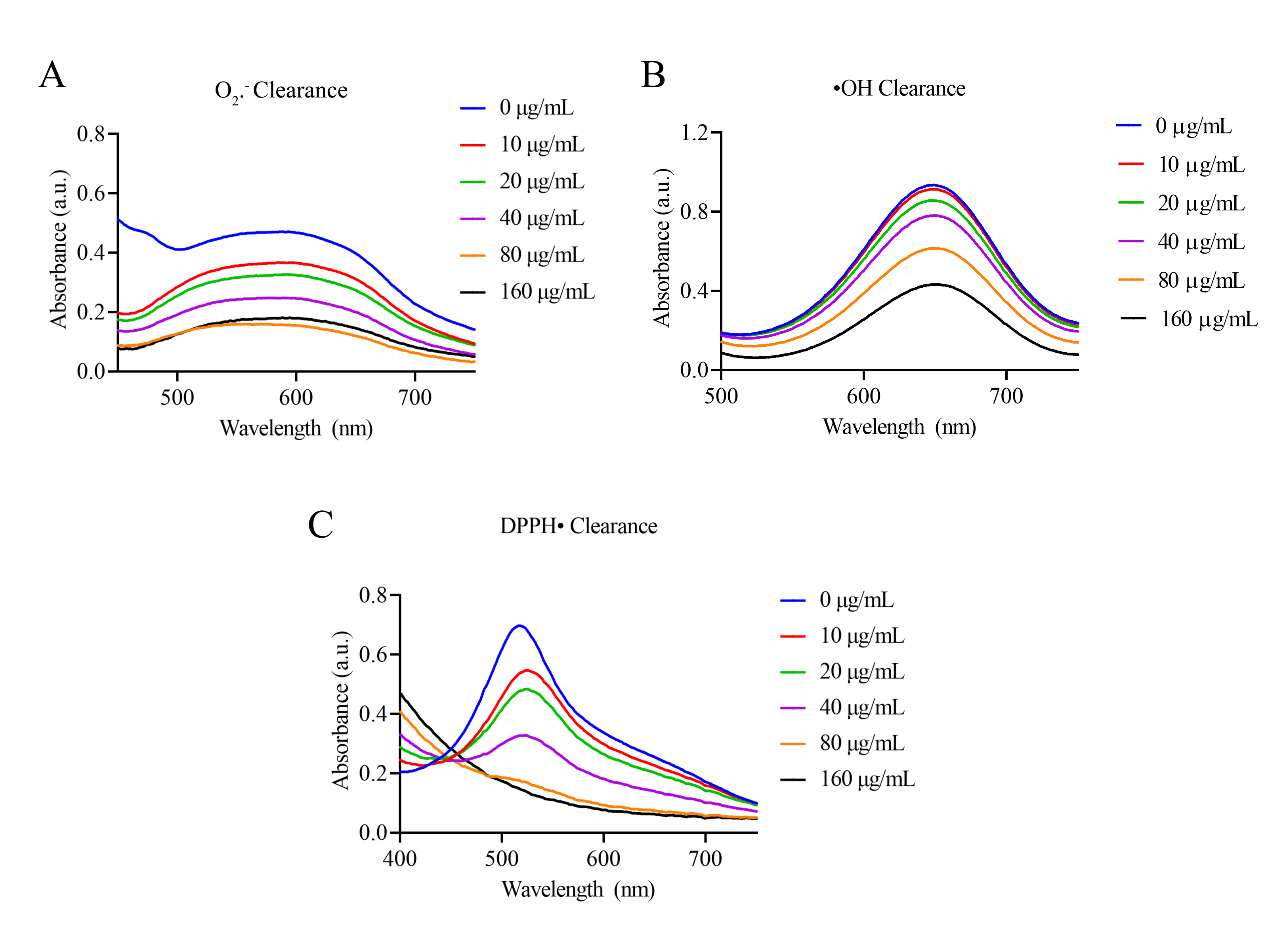


**Fig. S1.** Scavenging efficiencies of (A) superoxide anion (O2•−), (B) hydroxyl radicals (•OH), and (C) DPPH radical with different concentrations of PDA nanoparticles.


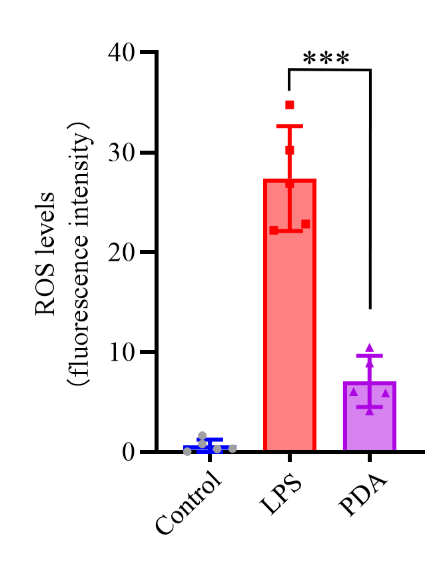


**Fig. S2.** Quantitative analysis (ANOVA) of ROS levels in Raw 264.7 treated with LPS (1 μg/mL) and PDA (200 μg/mL) for 12h. ****P* < 0.001. n = 5. Data are presented as the mean ± SD.


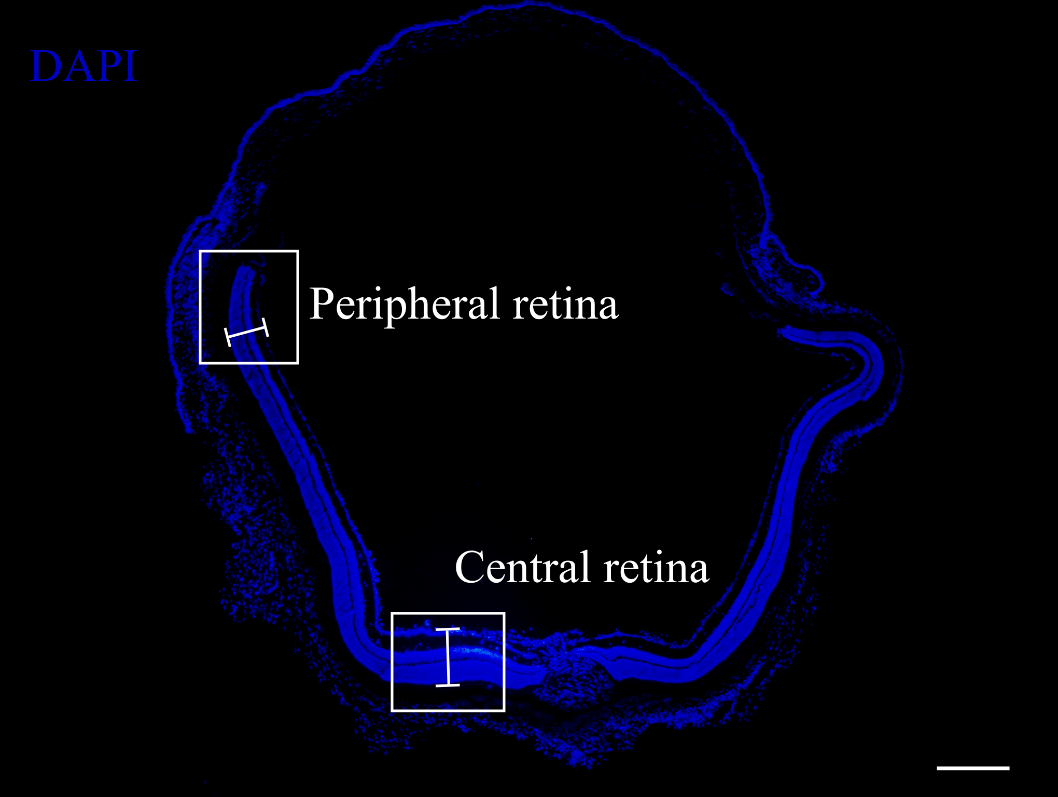


**Fig. S3.** DAPI staining of the retinal cross section, dashed lines indicate the region for analysis of central and peripheral retinal thickness. Bar = 200 μm.


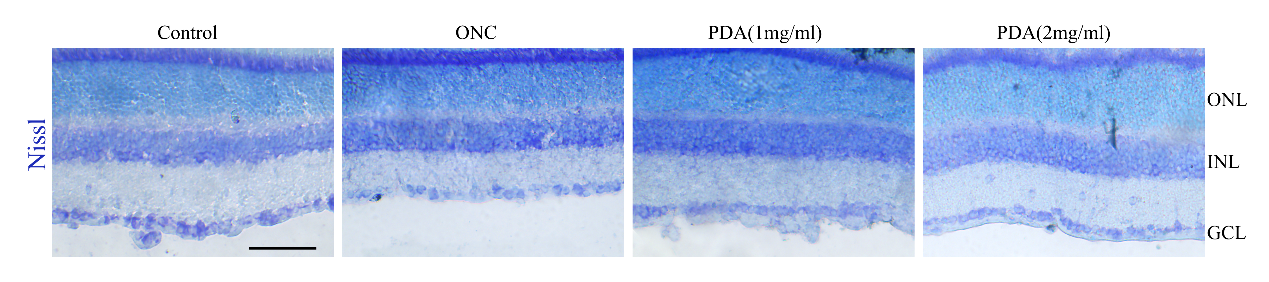


**Fig. S4.** Representative images of nissl stained retinal sections in mice treated with PDA. Bar = 50 μm.


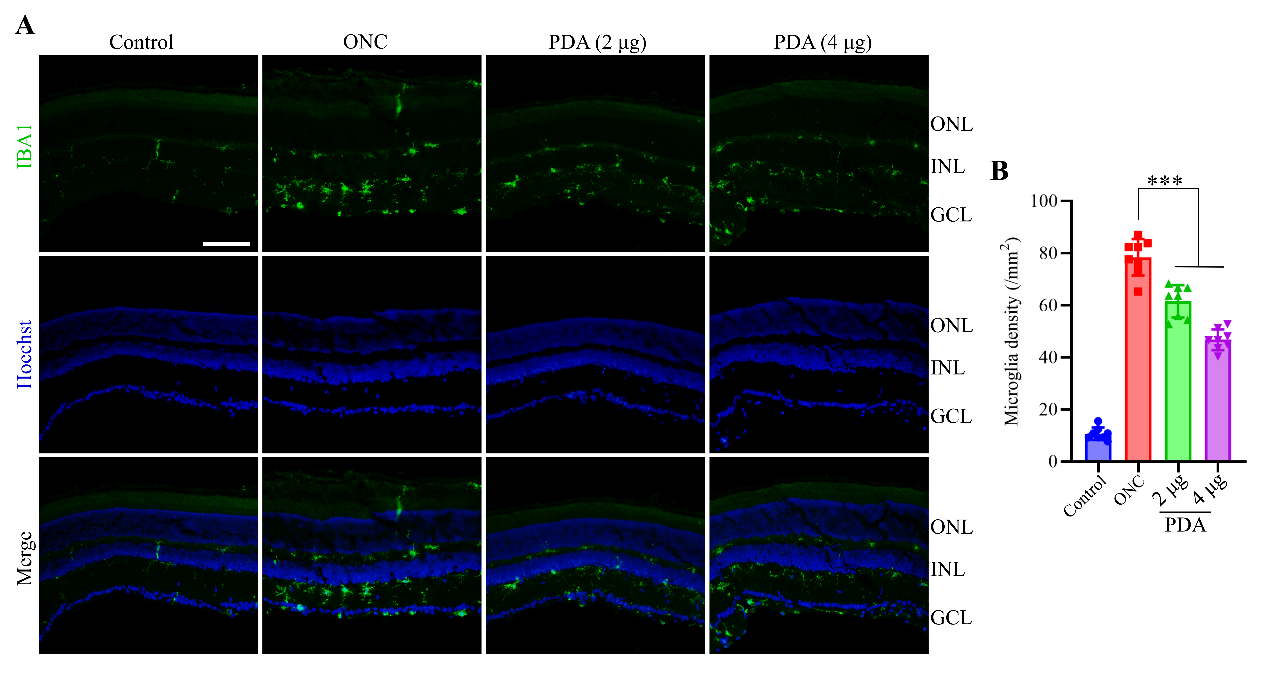


**Fig. S5.** Representative imageS and quantitative analysis (ANOVA) of microglia (IBA1-positive) densities in retinal sections. Bar = 50 μm. ****P* < 0.001. n = 8. Data are presented as the mean ± SD.


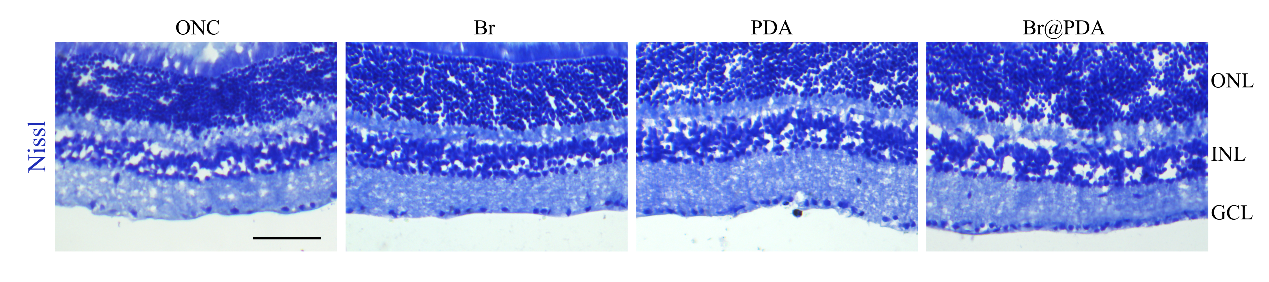


**Fig. S6.** Representative image of nissl stained retinal sections in mice treated with PDA, Br and Br@PDA. Bar = 50 μm.
